# Supplementary material for: LncRNA SLCO4A1-AS1 promotes colorectal cancer cell proliferation by enhancing autophagy via miR-508-3p/PARD3 axis
Source: Aging (Albany NY). 2019 Jul 16;11(14):4876–89. doi: 10.18632/aging.102081 (PMC6682525; doi:10.18632/aging.102081)
Supplement: Supplementary Table 1 [file aging-11-102081-s001.pdf]

## SUPPLEMENTARY TABLE

**Supplementary Table 1. Clinical pathological characteristics.**

| NO | Age | Gender | TNM stage | Lymph node metastasis |
|----|-----|--------|-----------|-----------------------|
| 1  | 45  | Female | IIA       | N0                    |
| 2  | 70  | Male   | IV        | N1                    |
| 3  | 69  | Male   | IIIB      | N2                    |
| 4  | 70  | Female | IIA       | N0                    |
| 5  | 58  | Male   | I         | N0                    |
| 6  | 70  | Female | IIIB      | N1                    |
| 7  | 77  | Male   | IIA       | N0                    |
| 8  | 82  | Male   | IIIC      | N 2                   |
| 9  | 80  | Female | IIIB      | N 0                   |
| 10 | 45  | Male   | IIA       | N 0                   |
| 11 | 70  | Male   | IIIC      | N 1                   |
| 12 | 69  | Male   | IIIB      | N 2                   |
| 13 | 72  | Male   | IIA       | N 0                   |
| 14 | 58  | Male   | IIA       | N 0                   |
| 15 | 70  | Female | IIIC      | N 0                   |
| 16 | 46  | Male   | IIIB      | N 1                   |
| 17 | 70  | Male   | IIA       | N 0                   |
| 18 | 69  | Male   | I         | N 1                   |
| 19 | 73  | Male   | IIIB      | N 0                   |
| 20 | 58  | Male   | IIA       | N 0                   |
| 21 | 70  | Female | IIIB      | N 1                   |
| 22 | 77  | Male   | I         | N 0                   |
| 23 | 82  | Female | I         | N 0                   |
